# Supplementary material for: Reasons for Not Seeking General Medical Care Among Individuals With Serious Mental Illness
Source: Atypon-hosted journal article supplement (doi:10.1176/appi.ps.201300348), 2014-04-15
Supplement: 818_ds001.pdf [file 818_ds001.pdf]

**Appendix Table A:** Socio-demographic and clinical characteristics and prevalence of delays in medical care seeking for any reason in adults with serious mental illness in two urban psychiatric clinics.

| Characteristics                | Delays in care seeking |          | No delays in care seeking |          | Unadjusted comparison among groups |           |      | Adjusted comparison among groups <sup>b</sup> |            |      |
|--------------------------------|------------------------|----------|---------------------------|----------|------------------------------------|-----------|------|-----------------------------------------------|------------|------|
|                                | N                      | Column % | N                         | Column % | OR                                 | 95% CI    | P    | AOR                                           | 95% CI     | P    |
| Sex                            |                        |          |                           |          |                                    |           |      |                                               |            |      |
| Female                         | 95                     | 56.2     | 49                        | 48.0     | 1.00                               | Ref.      | --   | 1.00                                          | Ref.       | --   |
| Male                           | 74                     | 43.8     | 53                        | 52.0     | .72                                | .44-1.18  | .192 | .76                                           | .40-1.42   | .385 |
| Age, years                     |                        |          |                           |          |                                    |           |      |                                               |            |      |
| <30                            | 33                     | 19.5     | 19                        | 18.6     | 1.00                               | Ref.      | --   | 1.00                                          | Ref.       | --   |
| 31-45                          | 68                     | 40.2     | 38                        | 37.3     | 1.03                               | .52-2.05  | .932 | 1.34                                          | .57-3.10   | .500 |
| 46-55                          | 53                     | 31.4     | 32                        | 31.4     | .95                                | .47-1.95  | .896 | .93                                           | .35-2.43   | .877 |
| 56+                            | 15                     | 8.9      | 13                        | 12.8     | .66                                | .26-1.69  | .390 | .42                                           | .12-1.41   | .158 |
| Race/ethnicity                 |                        |          |                           |          |                                    |           |      |                                               |            |      |
| Non-Hispanic white             | 63                     | 37.3     | 28                        | 27.5     | 1.00                               | Ref.      | --   | 1.00                                          | Ref.       | --   |
| Non-Hispanic black             | 89                     | 52.7     | 58                        | 56.9     | .68                                | .39-1.19  | .176 | .63                                           | .32-1.25   | .186 |
| Other                          | 17                     | 10.1     | 16                        | 15.7     | .47                                | .21-1.07  | .071 | .36                                           | .14-.94    | .037 |
| Education                      |                        |          |                           |          |                                    |           |      |                                               |            |      |
| <12 years                      | 53                     | 31.4     | 35                        | 34.3     | 1.00                               | Ref.      | --   | 1.00                                          | Ref.       | --   |
| 12 years or GED                | 65                     | 38.5     | 37                        | 36.3     | 1.16                               | .64-2.09  | .620 | 1.18                                          | .58-2.40   | .640 |
| At least some college          | 51                     | 30.2     | 30                        | 29.4     | 1.23                               | .60-2.09  | .715 | 1.81                                          | .77-4.26   | .176 |
| Employment                     |                        |          |                           |          |                                    |           |      |                                               |            |      |
| Currently working              | 18                     | 10.7     | 13                        | 12.8     | 1.00                               | Ref.      | --   | 1.00                                          | Ref.       | --   |
| Not working, not disabled      | 47                     | 27.8     | 24                        | 23.5     | 1.41                               | .59-3.36  | .433 | 1.74                                          | .61-4.95   | .299 |
| Not working, disabled          | 104                    | 61.5     | 65                        | 63.7     | 1.16                               | .53-2.52  | .716 | 1.35                                          | .50-3.63   | .548 |
| Number of health conditions    |                        |          |                           |          |                                    |           |      |                                               |            |      |
| 0                              | 43                     | 25.4     | 36                        | 35.3     | 1.00                               | Ref.      | --   | 1.00                                          | Ref.       | --   |
| 1                              | 51                     | 30.2     | 25                        | 24.5     | 1.71                               | .89-3.28  | .108 | 1.87                                          | .86-4.08   | .115 |
| 2                              | 34                     | 20.1     | 19                        | 18.6     | 1.50                               | .73-3.06  | .268 | 1.47                                          | .60-3.61   | .404 |
| 3+                             | 41                     | 24.3     | 22                        | 21.6     | 1.56                               | .79-3.08  | .201 | 1.90                                          | .76-4.79   | .171 |
| Place for routine medical care |                        |          |                           |          |                                    |           |      |                                               |            |      |
| Doctor's office or HMO         | 103                    | 61.3     | 73                        | 72.3     | 1.00                               | Ref.      | --   | 1.00                                          | Ref.       | --   |
| Public clinic or health center | 39                     | 23.2     | 12                        | 11.9     | 2.30                               | 1.13-4.70 | .022 | 4.59                                          | 1.91-11.02 | .001 |
| Other                          | 10                     | 6.0      | 6                         | 5.9      | 1.18                               | .41-3.39  | .757 | 1.25                                          | .34-4.60   | .738 |
| No place                       | 16                     | 9.5      | 10                        | 9.9      | 1.13                               | .49-2.64  | .771 | 1.01                                          | .39-2.64   | .979 |

|                                                                                                                                                                                                            |             |           |             |           |      |           |       |      |           |      |
|------------------------------------------------------------------------------------------------------------------------------------------------------------------------------------------------------------|-------------|-----------|-------------|-----------|------|-----------|-------|------|-----------|------|
| Psychiatric diagnosis                                                                                                                                                                                      |             |           |             |           |      |           |       |      |           |      |
| Bipolar disorder                                                                                                                                                                                           | 75          | 44.4      | 48          | 47.1      | 1.00 | Ref.      | --    | 1.00 | Ref.      | --   |
| Schizophrenia                                                                                                                                                                                              | 54          | 32.0      | 35          | 34.3      | .99  | .56-1.73  | .965  | 1.73 | .79-3.77  | .169 |
| Major depressive disorder                                                                                                                                                                                  | 28          | 16.6      | 12          | 11.8      | 1.49 | .69-3.22  | .306  | 1.71 | .64-4.60  | .284 |
| Psychotic disorder, NOS                                                                                                                                                                                    | 12          | 7.1       | 7           | 6.9       | 1.10 | 1.09-2.24 | .856  | 1.51 | .41-5.59  | .538 |
| Received any help for making it to the doctors or health appointments                                                                                                                                      | 86          | 50.9      | 50          | 49.5      | 1.06 | 0.65-1.73 | .826  | 1.05 | .56-1.97  | .871 |
|                                                                                                                                                                                                            | <b>Mean</b> | <b>SD</b> | <b>Mean</b> | <b>SD</b> |      |           |       |      |           |      |
| Positive and Negative Symptoms Scale (PANSS) <sup>a</sup>                                                                                                                                                  |             |           |             |           |      |           |       |      |           |      |
| Positive symptoms                                                                                                                                                                                          | 15.34       | 6.44      | 15.06       | 6.00      | 1.05 | .81-1.35  | .729  | .81  | .47-1.37  | .424 |
| Negative symptoms                                                                                                                                                                                          | 12.03       | 5.44      | 12.71       | 5.50      | .89  | .69-1.14  | .343  | .72  | .49-1.05  | .089 |
| General psychopathology                                                                                                                                                                                    | 31.74       | 9.39      | 29.92       | 8.24      | 1.23 | .95-1.60  | .120  | 1.21 | .68-2.16  | .509 |
| Behavior and Symptom Identification Scale (BASIS-24) <sup>a</sup>                                                                                                                                          |             |           |             |           |      |           |       |      |           |      |
| Depression and functioning                                                                                                                                                                                 | 2.79        | .64       | 2.46        | .67       | 1.70 | 1.28-2.26 | <.001 | 1.55 | 1.00-2.41 | .048 |
| Interpersonal problems                                                                                                                                                                                     | 3.35        | .89       | 3.50        | .80       | .84  | .65-1.09  | .189  | .96  | .65-1.42  | .841 |
| Psychotic symptoms                                                                                                                                                                                         | 2.06        | .92       | 1.93        | .88       | 1.16 | .89-1.50  | .271  | .89  | .57-1.39  | .604 |
| Alcohol and drug use                                                                                                                                                                                       | 1.54        | .75       | 1.59        | .78       | .93  | .72-1.20  | .566  | .76  | .55-1.05  | .091 |
| Emotional lability                                                                                                                                                                                         | 3.08        | 1.03      | 2.62        | 1.04      | 1.57 | 1.20-2.05 | .001  | 1.37 | .88-2.14  | .168 |
| Self-harm                                                                                                                                                                                                  | 1.45        | .83       | 1.25        | .58       | 1.35 | .99-1.83  | .051  | 1.01 | .70-1.46  | .948 |
| Mini-Mental State Examination (MMSE) <sup>a</sup>                                                                                                                                                          | 26.03       | 2.93      | 26.25       | 3.04      | .93  | 0.72-1.20 | .570  | .81  | 0.57-1.13 | .215 |
| Impairment in activities of daily living <sup>a</sup>                                                                                                                                                      | 1.34        | .49       | 1.28        | .56       | 1.11 | .86-1.44  | .416  | .92  | .67-1.28  | .623 |
| <b>Note:</b> OR stands for odds ratio, CI for confidence interval, HMO for Health Maintenance Organization, NOS for not otherwise specified.                                                               |             |           |             |           |      |           |       |      |           |      |
| <sup>a</sup> Regression analyses were conducted with standardized score computed by subtracting the sample mean value from each individual score and dividing the result by the sample standard deviation. |             |           |             |           |      |           |       |      |           |      |
| <sup>b</sup> Results of analyses with multiply imputed data.                                                                                                                                               |             |           |             |           |      |           |       |      |           |      |
